# Supplementary material
Source: PubMed Central journal article supplement (PMC4651021)

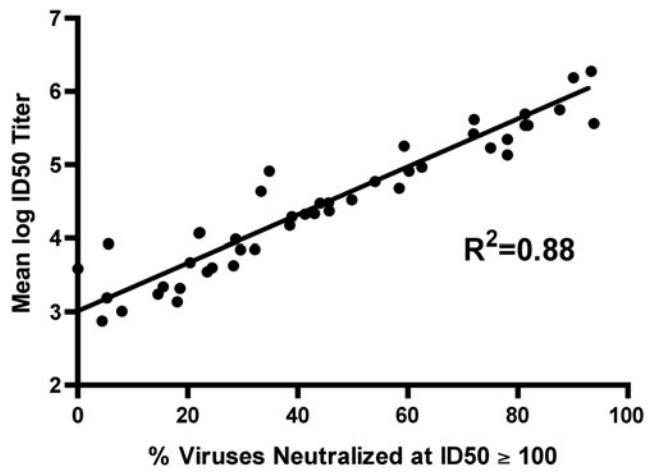

**SUPPLEMENTARY FIG. S2.** Correlation of sample breadth and potency.

Supplement: Supp_Fig2.pdf [file Supp_Fig2.pdf]
